# Supplementary material
Source: publisher figshare collection journal article supplement (https://future-science-group.figshare.com/articles/dataset/_/23904450)
Supplement: Supplementary file 1 [file 1]

## Sheet: Sheet1
Supplementary Table S3: Distribution and characteristics of 593 polymorphic SNPs in the Malagasy, European, African, South Asian, and East Asian populations
Gene (RefSeq)1	CHR	SNP	Location GRCh37	Location GRCh38	SNP ID	Genomic sequence position1	Variant impact	Allele/suballele2	A1	A2	MAF	NCHROBS	Global MAF3	EUR MAF3	AFR MAF3	SAS MAF3	EAS MAF3
UGT1A†	2	rs2741049	234581834	233673188	rs2741049	88445T>C	Intron variant	n/a	G	A	0.4545	110	0.577	0.604	0.616	0.691	0.438
(NG_002601.2)	2	rs79913681	234584108	233675462	rs79913681	90719C>G	Intron variant	n/a	G	C	0.009091	110	0.022	0.024	0.001	0.055	0.019
	2	exm-rs2602381	234584324	233675678	rs2602381	90935T>C	Intron variant	n/a	G	A	0.3818	110	0.442	0.521	0.402	0.609	0.27
	2	JHU_2.234584501	234584502	233675856	rs28969706	91113A>G	Intron variant	n/a	G	A	0.01818	110	0.009	0	0.0334636	0	0
	2	rs12472689	234589616	233680970	rs12472689	96227C>T	Intron variant	n/a	A	G	0.1818	110	0.173	0.22	0.082	0.218	0.214
	2	2:234590527-T-G	234590527	233681881	rs7586110	97138T>G	Intron variant	n/a	C	A	0.1636	110	0.298	0.36	0.25	0.427	0.196
	2	exm277137	234591000	233682354	rs114052958	97611G>C	Glu139Asp	UGT1A7	C	G	0.009091	110	0.013	0.001	0.045	0	0
	2	2:234593117-G-T	234593117	233684471	rs4261716	99728G>T	Intron variant	n/a	A	C	0.1727	110	0.358	0.383	0.36	0.476	0.224
	2	rs11680450	234597483	233688837	rs11680450	104094T>C	Intron variant	n/a	G	A	0.1818	110	0.362	0.382	0.377	0.476	0.224
	2	JHU_2.234599405	234599406	233690760	rs12469671	106017T>C	Intron variant	n/a	G	A	0.4545	110	0.273	0.267	0.3071	0.297	0.247
	2	kgp14713059	234600424	233691778	rs45618133	107035G>A	Intron variant/5'UTR	n/a	A	G	0.009091	110	0.005	0.001	0.016	0	0
	2	rs6759892	234601669	233693023	rs6759892	108280T>G	Ser7Ala	Many UGT1A6	C	A	0.1818	110	0.362	0.383	0.377	0.476	0.224
	2	kgp3011360	234601965	233693319	rs1105880	108576A>G	Leu105=	Many UGT1A6	G	A	0.1818	110	0.343	0.333	0.368	0.467	0.224
	2	exm277187	234602191	233693545	rs2070959	108802A>G	Thr181Ala	Many UGT1A6	G	A	0.1636	110	0.278	0.31	0.239	0.418	0.196
	2	exm277188	234602202	233693556	rs1105879	108813A>C	Arg184Ser	Many UGT1A6	C	A	0.1727	110	0.325	0.333	0.302	0.467	0.224
	2	rs17863783	234602277	233693631	rs17863783	108888G>T	Val209=	UGT1A6 *4b	A	C	0.01818	110	0.065	0.023	0.129	0.049	0.028
	2	JHU_2.234603779	234603780	233695134	rs112070935	110391T>C	Intron variant	n/a	G	A	0.2545	110	0.1535	0.131	0.2347	0.28	0.144
	2	JHU_2.234607559	234607560	233698914	rs12471030	114171C>T	Intron variant	n/a	A	G	0.1818	110	0.17	0.226	0.057	0.229	0.217
	2	rs6725478	234615400	233706754	rs6725478	122011C>T	Intron variant	n/a	A	G	0.3	110	0.388	0.337	0.675	0.397	0.073
	2	rs4663327	234617632	233708986	rs4663327	124243G>A	Intron variant	n/a	A	G	0.2091	110	0.212	0.108	0.221	0.267	0.277
	2	exm277212	234621825	233713179	rs3755321	128436T>C	Leu63Pro	UGT1A5	G	A	0.1636	110	0.145	0.096	0.081	0.222	0.233
	2	kgp235203	234622294	233713648	rs17863790	128905C>T	Ala219=	UGT1A5	A	G	0.1481	108	0.101302	0.09	0.103938	0.195462	0.204836
	2	indel.66250	234622486	233713840	rs760861732	129097_129098insTT	Gly284fs	n/a	I	D	0.009091	110	0.004	0.004	0	0	0
	2	2:234627248-C-T	234627248	233718602	rs3732219	133859C>T	Intron variant	n/a	A	G	0.1636	110	0.144	0.094	0.08	0.218	0.233
	2	2:234627304-G-A	234627304	233718658	rs3732218	133915G>A	Intron variant	n/a	A	G	0.1636	110	0.144	0.095	0.08	0.218	0.233
	2	2:234627914-T-C	234627914	233719268	rs12468274	134525T>C	Leu150=	UGT1A4*1c, UGT1A4*7	G	A	0.1389	108	0.131	0.066	0.074	0.202	0.229
	2	kgp11386053	234627937	233719291	rs2011404	134548T>C	Cys157=	UGT1A4*1b	A	G	0.05455	110	0.092	0.186	0.023	0.144	0.026
	2	kgp14534247	234627992	233719346	rs45540231	134603A>T	Ile176Phe	UGT1A4, n/a	T	A	0.009091	110	0.024	0.001	0.086	0	0
	2	2:234628529-T-C	234628529	233719883	rs871514	135140T>C	Intron variant	n/a	G	A	0.4537	108	0.572	0.415	0.831	0.647	0.356
	2	2:234628679-T-G	234628679	233720033	rs13401281	135290T>G	Intron variant	n/a	C	A	0.2818	110	0.389	0.323	0.604	0.427	0.122831
	2	rs4294999	234635467	233726821	rs4294999	142078A>G	Intron variant	n/a	G	A	0.4545	110	0.574	0.416	0.834	0.648	0.356
	2	2:234637803-TC	234637803	233729157	rs3821242	144414T>C	Trp11Arg	Many UGT1A3	G	A	0.3981	108	0.535	0.415	0.697	0.642	0.355
	2	kgp24372140	234638005	233729359	rs28898618	144616C>T	Thr78Ile	UGT1A3, n/a	A	G	0.009091	110	0.006	0	0.022	0	0
	2	exm277373	234638114	233729468	rs28898619	144725G>A	Met114Ile	UGT1A3*11a	A	G	0.009091	110	0.007	0	0.027	0	0
	2	2:234638282-G-GT	234638282	233729636	rs45586035	144901delT	Phe172_Leu173insTer	n/a	I	D	0.009091	110	0.006	0	0.023	0	0
	2	exm277410	234638580	233729934	rs45449995	145191A>G	Met270Val	UGT1A3*6a	G	A	0.009091	110	0.024	0.024	0.052	0.0163765	0.003
	2	rs11891311	234639310	233730664	rs11891311	145921G>A	Intron variant	n/a	A	G	0.2636	110	0.402	0.325	0.647	0.425	0.123
	2	rs2018985	234648860	233740214	rs2018985	155471A>G	Intron variant	n/a	G	A	0.2818	110	0.441	0.351	0.753	0.443	0.128
	2	rs17862875	234649302	233740656	rs17862875	155913G>A	Intron variant	n/a	A	G	0.1909	110	0.295265	0.274	0.315	0.417	0.124
	2	kgp14756084	234651822	233743176	rs28900375	158433T>C	Intron variant	n/a	G	A	0.009091	110	0.008	0	0.029	0	0
	2	kgp14248269	234652257	233743611	rs28900377	158868C>T	Intron variant	n/a	A	G	0.02727	110	0.022	0.001	0.084	0	0
	2	exm277431	234652308	233743662	rs34622615	158919G>T	Intron variant	n/a	A	C	0.009091	110	0.023	0.024	0.05	0.016	0.003
	2	2:234652331-TC	234652331	233743685	rs192235508	158942T>C	Intron variant	n/a	G	A	0.009259	108	0.00216556	0.001	0.002	0.001	0.004
	2	kgp7355471	234652347	233743701	rs13009407	158958C>G	Intron variant	n/a	G	C	0.05455	110	0.146	0.236	0.012	0.331	0.041
	2	kgp14221938	234652437	233743791	rs77053267	159048C>T	Intron variant	n/a	A	G	0.009091	110	0.006	0	0.02	0	0
	2	kgp8016016	234652642	233743996	rs76063448	159253C>T	Intron variant	n/a	A	G	0.009091	110	0.023	0.024	0.048	0.016	0.003
	2	JHU_2.234653291	234653292	233744646	rs28899468	159903T>C	Intron variant	n/a	G	A	0.009259	108	0.0364447	0.036	0.0526994	0.01717	0.00172811
	2	rs1054804	234663045	233754399	rs1054804	169656C>T	Intron variant	n/a	A	G	0.009091	110	0.024	0.025	0.0507288	0.0169983	0.003
	2	2:234665659-T-G	234665659	233757013	rs4124874	172270T>G	Intron variant	n/a	C	A	0.5	110	0.588	0.416	0.899	0.628	0.356
	2	rs12052787	234666581	233757935	rs12052787	173192C>T	Intron variant	n/a	A	G	0.1545	110	0.117	0.067	0.041	0.181	0.222
	2	2:234667582-A-C	234667582	233758936	rs3755319	174193A>C	Intron variant	n/a	C	A	0.4727	110	0.55	0.415	0.761	0.628	0.355
	2	2:234667937-G-A	234667937	233759291	rs2003569	174548G>A	Intron variant	n/a	A	G	0.2727	110	0.196	0.116	0.268	0.191	0.224
	2	JHU_2.234668244	234668245	233759599	rs759174	174856A>C	Intron variant	n/a	C	A	0.4727	110	0.55	0.415	0.761	0.628	0.354
	2	exm-rs887829	234668570	233759924	rs887829	175181C>T	Intron variant	n/a	A	G	0.2	110	0.354	0.298	0.493	0.437	0.13
	2	rs28946889	234671462	233762816	rs28946889	178073G>T	Intron variant	n/a	A	C	0.4	110	0.212	0.266	0.023	0.169	0.422
	2	rs6742078	234672639	233763993	rs6742078	179250G>T	Intron variant	n/a	A	C	0.1909	110	0.348	0.298	0.471	0.435	0.13
	2	rs3771342	234672663	233764017	rs3771342	179274G>T	Intron variant	n/a	A	C	0.2091	110	0.161	0.114	0.138	0.193	0.224
	2	JHU_2.234673187	234673188	233764542	rs34078324	179799C>T	Intron variant	n/a	A	G	0.009091	110	0.011	0	0.039	0	0
	2	exm-rs4148325	234673309	233764663	rs4148325	179920C>T	Intron variant	n/a	A	G	0.2	110	0.354	0.298	0.493	0.435	0.13
	2	JHU_2.234673687	234673688	233765042	rs45619032	180299C>T	Intron variant	n/a	A	G	0.009091	110	0.00605422	0	0.023	0	0
	2	rs11563251	234679384	233770738	rs11563251	185995C>T	Intron variant	n/a	A	G	0.3	110	0.208	0.118	0.423	0.181	0.118
	2	rs10929303	234681416	233772770	rs10929303	188027T>C	3'UTR	n/a	A	G	0.2727	110	0.248	0.229	0.423	0.17	0.133
	2	rs1042640	234681544	233772898	rs1042640	188155G>C	3'UTR	n/a	G	C	0.2	110	0.179	0.201	0.196	0.17	0.133
	2	kgp7359081	234681645	233772999	rs8330	188256G>C	3'UTR	n/a	G	C	0.3	110	0.255	0.237	0.438	0.176	0.131
UGT2B17	4	JHU_4.69403829	69403830	68538112	rs7671342	35416T>C	Intron variant	n/a	G	A	0.02727	110	0.234	0.23	0.315	0.187	0.033
(NG_017033.1)	4	JHU_4.69425834	69425835	68560117	rs113397814	13411G>A	Intron variant	n/a	A	G	0.09091	110	0.26	0.534	0.091	0.274	0.138
UGT2B15	4	JHU_4.69512376	69512377	68646659	rs17324486	29118A>G	3'UTR	n/a	G	A	0.009091	110	0.0108759	0.003	0.033	0	0.003
(NG_052676.1)	4	rs4148271	69512637	68646919	rs4148271	28858A>T	3'UTR	n/a	A	T	0.1364	110	0.082	0.015	0.005	0.086	0.27
	4	rs3100	69512654	68646936	rs3100	28841C>T	3'UTR	n/a	A	G	0.2455	110	0.374	0.636	0.15	0.504	0.189
	4	4:69512835-TC	69512835	68647117	rs146711063	28660A>G	Lys527Arg	x	G	A	0.04545	110	0.0117727	0	0.044	0	0
	4	JHU_4.69527987	69527988	68662270	rs182404941	13507C>A	Intron variant	n/a	A	C	0.009091	110	0.007	0	0.026	0	0
	4	rs62298393	69528271	68662553	rs62298393	13224C>T	Intron variant	n/a	A	G	0.07273	110	0.146	0.257	0.156	0.17	0.001
	4	JHU_4.69530053	69530054	68664336	rs143970353	11441T>C	Intron variant	n/a	G	A	0.009091	110	0.011	0	0.039	0	0
	4	JHU_4.69531122	69531123	68665405	rs145641914	10372A>G	Intron variant	n/a	G	A	0.02727	110	0.021	0.001	0.07	0	0
	4	4:69533802-AC	69533802	68668084	rs141576110	7693T>G	Phe277Val	x	C	A	0.02727	110	0.002	0	0.008	0	0
	4	kgp20730231	69535828	68670110	rs72551392	5667T>C	Leu170Pro	x (in Exon 1)	G	A	0.02727	110	0.007	0	0.026	0	0
	4	kgp575508	69536084	68670366	rs1902023	5411T>G	Tyr85Asp	*2, *5	C	A	0.4818	110	0.547	0.487	0.602	0.459	0.577
UGT2B10	4	kgp21193627	69681746	68816028	rs115319615	-	Leu3=	x	A	G	0.04545	110	0.016	0	0.058	0	0
(-)	4	JHU_4.69682854	69682855	68817137	rs835309	-	Intron variant	n/a	A	C	0.3704	108	0.233	0.093	0.618	0.057	0.086
	4	rs844342	69684121	68818403	rs844342	-	Intron variant	n/a	A	C	0.5	108	0.672	0.9	0.244	0.895	0.697
	4	rs835317	69686221	68820503	rs835317	-	Intron variant	n/a	C	A	0.3704	108	0.233	0.093	0.617	0.057	0.086
	4	exm403006	69687987	68822269	rs2942857	-	splice_acceptor_variant	n/a	C	A	0.2685	108	0.151	0.002	0.442	0.027	0.0852953
	4	JHU_4.69692792	69692793	68827075	rs181718111	-	Intron variant	n/a	A	T	0.02727	110	0.014	0	0.051	0	0
	4	exm403042	69696430	68830712	rs200109225	-	His474Tyr	x	A	G	0.009091	110	0.001	0.001	0	0.00103434	0
	4	kgp21179937	69696708	68830990	rs114344683	-	3'UTR	n/a	A	C	0.03636	110	0.011	0.001	0.04	0	0
	4	kgp20773344	69697128	68831410	rs149115021	-	3'UTR	n/a	G	A	0.009091	110	0.017	0.001	0.016	0.062	0.001
	4	kgp21320124	69697559	68831841	rs7661590	-	3'UTR	n/a	A	T	0.02727	110	0.022	0.001	0.081	0	0
UGT2B7	4	rs6833862	69923096	69057378	rs6833862	-	Intron variant	n/a	G	A	0.1727	110	0.249	0.164	0.213	0.208	0.438
(-)	4	4:69926817-G-A	69926817	69061099	rs116537499	-	Intron variant	n/a	A	G	0.07273	110	0.028	0	0.1	0	0
	4	rs7662632	69927974	69062256	rs7662632	-	Intron variant	n/a	A	G	0.4545	110	0.485	0.642	0.292	0.57898	0.397
	4	rs9991142	69932587	69066869	rs9991142	-	Intron variant	n/a	G	A	0.1909	110	0.166	0.195	0.169	0.127	0.044
	4	4:69935067-C-T	69935067	69069349	rs60930838	-	Intron variant	n/a	A	G	0.1091	110	0.027	0.04	0.046	0.00913621	0
	4	JHU_4.69935136	69935137	69069419	rs7668373	-	Intron variant	n/a	C	A	0.1727	110	0.25	0.164	0.211	0.213	0.439
	4	JHU_4.69937852	69937853	69072135	rs7660019	-	Intron variant	n/a	G	A	0.4545	110	0.49	0.644	0.285	0.59	0.399
	4	JHU_4.69947087	69947088	69081370	rs548501123	-	Intron variant	n/a	G	A	0.009091	110	0.005	0	0.018	0	0
	4	JHU_4.69952474	69952475	69086757	rs73823851	-	Intron variant	n/a	T	A	0.1091	110	0.027	0.039	0.048	0.009	0
	4	4:69960387-C-G	69960387	69094669	rs6600879	-	Intron variant	n/a	C	G	0.2818	110	0.335	0.485	0.227	0.399	0.275
	4	4:69960480-T-A	69960480	69094762	rs6600880	-	Intron variant	n/a	T	A	0.2818	110	0.335	0.485	0.227	0.399	0.275
	4	4:69960555-C-T	69960555	69094837	rs4554144	-	Intron variant	n/a	G	A	0.2818	110	0.335	0.485	0.227	0.398	0.275
	4	4:69961127-T-C	69961127	69095409	rs11940316	-	Intron variant	n/a	A	G	0.2818	110	0.335	0.485	0.227	0.399	0.275
	4	4:69961339-G-A	69961339	69095621	rs7438135	-	Intron variant	n/a	G	A	0.2818	110	0.335	0.486	0.227	0.399	0.275
	4	4:69961912-A-G	69961912	69096194	rs7662029	-	Intron variant	n/a	A	G	0.2818	110	0.335	0.485	0.226	0.399	0.276
	4	4:69962078-T-C	69962078	69096360	rs7668258	-	Intron variant	n/a	A	G	0.2818	110	0.335	0.485	0.227	0.399	0.275
	4	4:69962101-G-A	69962101	69096383	rs73823859	-	Intron variant	n/a	A	G	0.1091	110	0.027	0.039	0.048	0.009	0
	4	exm403199	69962449	69096731	rs12233719	-	Ala71Ser	*3	A	C	0.01818	110	0.03	0.004	0.001	0.007	0.132
	4	exm403204	69962559	69096841	rs140153012	-	Leu107Phe	x (in Exon 1)	T	A	0.009091	110	0.003	0	0.008	0	0
	4	kgp2021290	69962610	69096892	rs28365063	-	Arg124=	*3	G	A	0.1364	110	0.134	0.191	0.075	0.146	0.171		Chamnanphon et al., 2020
	4	exm403211	69962774	69097056	rs60103519	-	Thr179Ile	x (in Exon 1)	A	G	0.02727	110	0.008	0	0.03	0	0
	4	JHU_4.69963423	69963424	69097706	rs62296959	-	Intron variant	n/a	A	G	0.01818	110	0.046	0.141	0.002	0.024	0.002
	4	4:69963944-A-G	69963944	69098226	rs62298861	-	Intron variant	n/a	G	A	0.2182	110	0.182	0.155	0.275	0.119	0.044
	4	rs4293848	69965502	69099784	rs4293848	-	Intron variant	n/a	A	G	0.2818	110	0.337	0.485	0.233	0.399	0.276
	4	rs7439152	69969006	69103288	rs7439152	-	Intron variant	n/a	C	A	0.2818	110	0.319	0.485	0.17	0.399	0.275
	4	rs7435335	69971335	69105617	rs7435335	-	Intron variant	n/a	A	G	0.2091	110	0.177	0.155	0.257	0.118	0.044
	4	JHU_4.69973725	69973726	69108008	rs10022440	-	Intron variant	n/a	A	G	0.009091	110	0.034	0.081	0.039	0.009	0
UGT2B4	4	rs1131878	70345904	69480186	rs1131878	-	3'UTR	n/a	G	A	0.1909	110	0.246	0.299	0.362	0.13	0.104
(-)	4	kgp21138855	70346057	69480339	rs1051752	-	3'UTR	n/a	C	A	0.1273	110	0.036	0.001	0.127	0	0
	4	rs1966151	70346127	69480409	rs1966151	-	3'UTR	n/a	G	A	0.4364	110	0.291	0.254	0.324	0.239	0.422
	4	rs28361541	70349620	69483902	rs28361541	-	Intron variant	n/a	G	A	0.05455	110	0.16	0.174	0.062	0.18	0.243337
	4	4:70350006-G-T	70350006	69484288	rs4557343	-	Intron variant	n/a	A	C	0.3818	110	0.488	0.446	0.404	0.632	0.474
	4	rs1121124	70350444	69484726	rs1121124	-	Intron variant	n/a	C	A	0.3818	110	0.491	0.448	0.41	0.632	0.474
	4	JHU_4.70351401	70351402	69485684	rs9997034	-	Intron variant	n/a	C	A	0.2455	110	0.447	0.444	0.247	0.636	0.487
	4	4:70361053-GA	70361053	69495335	rs373966654	-	Pro176Leu	x	A	G	0.009091	110	0.004	0	0	0.018	0
	4	rs2736442	70362742	69497024	rs2736442	-	Intron variant	n/a	A	G	0.1455	110	0.056	0.001	0.2	0	0
	4	rs28808128	70366492	69500774	rs28808128	-	Intron variant	n/a	A	C	0.4636	110	0.453	0.432	0.216	0.516	0.742
	4	JHU_4.70377401	70377402	69511684	rs12642506	-	Intron variant	n/a	G	A	0.3182	110	0.323	0.373	0.343	0.31	0.254
	4	JHU_4.70379727	70379728	69514010	rs4484367	-	Intron variant	n/a	A	T	0.3241	108	0.096	0.113	0.125	0.083	0.043
	4	rs57149346	70383502	69517784	rs57149346	-	Intron variant	n/a	A	T	0.1	110	0.0197628	0	0.069	0	0
	4	JHU_4.70388609	70388610	69522892	rs28770265	-	Intron variant	n/a	A	T	0.3182	110	0.323	0.371	0.344	0.308	0.255
	4	JHU_4.70389214	70389215	69523497	rs79407331	-	Intron variant	n/a	A	C	0.06364	110	0.048	0.017	0.085	0.029	0.065
	4	JHU_4.70389516	70389517	69523799	rs112496072	-	Intron variant	n/a	A	G	0.09091	110	0.00843535	0	0.028	0	0
	4	JHU_4.70390097	70390098	69524380	rs34681342	-	Intron variant	n/a	A	G	0.3148	108	0.322	0.365	0.346	0.309	0.261
	4	JHU_4.70390280	70390281	69524563	rs34461063	-	Intron variant	n/a	A	G	0.3182	110	0.322	0.365	0.345	0.31	0.256
	4	4:70391429-GA	70391429	69525711	rs11732968	-	His7Tyr	x	A	G	0.3182	110	0.323	0.369	0.346	0.309	0.256
ABCG2	4	kgp29294911	89011422	88090270	rs45510401	146053T>C	3'UTR	?	G	A	0.01852	108	0.011	0	0.038	0.003	0
(NG_032067.2)	4	kgp20836098	89011660	88090508	rs115770495	145815G>A	3'UTR	?	A	G	0.01818	110	0.018	0	0.049	0.02	0.001
	4	rs1448784	89012320	88091168	rs1448784	145155T>C	3'UTR	?	G	A	0.1636	110	0.073	0.015	0.006	0.0644693	0.256
	4	4:89015857-C-T	89015857	88094705	rs2231164	141618G>A	Intron variant	?	A	G	0.4364	110	0.572	0.872	0.23	0.763	0.519
	4	rs2725267	89016175	88095023	rs2725267	141300C>T	Intron variant	?	G	A	0.3091	110	0.324	0.055	0.753	0.154	0.233
	4	rs45621036	89017699	88096547	rs45621036	139776A>G	Intron variant	?	G	A	0.03636	110	0.022	0.003	0.076	0	0
	4	rs2231157	89018565	88097413	rs2231157	138910T>C	Intron variant	?	G	A	0.1273	110	0.31	0.439	0.089	0.438	0.316
	4	4:89020934-G-A	89020934	88099782	rs4148157	136541C>T	Intron variant	?	A	G	0.2545	110	0.101	0.073	0.016	0.07	0.248
	4	4:89029252-A-C	89029252	88108100	rs2622628	128223T>G	Intron variant	?	A	C	0.2273	110	0.236	0.048	0.477	0.127	0.217
	4	rs79213345	89029717	88108565	rs79213345	127758T>C	Intron variant	?	G	A	0.03636	110	0.09	0.021	0.024	0.091	0.174
	4	4:89030841-T-G	89030841	88109689	rs12505410	126634A>C	Intron variant	?	C	A	0.2636	110	0.279	0.396	0.097	0.263	0.319
	4	4:89033527-T-C	89033527	88112375	rs13120400	123948A>G	Intron variant	?	G	A	0.02727	110	0.105	0.297	0.023	0.091	0
	4	rs1481012	89039082	88117930	rs1481012	118393T>C	Intron variant	?	G	A	0.1909	110	0.119	0.089	0.014	0.099	0.291
	4	4:89039500-T-C	89039500	88118348	rs2231146	117975A>G	Intron variant	?	G	A	0.1727	110	0.065	0.019	0.013	0.05	0.213
	4	rs1871744	89039629	88118477	rs1871744	117846A>G	Intron variant	?	G	A	0.2545	110	0.173	0.223	0.073	0.139	0.309
	4	rs2725256	89050998	88129846	rs2725256	106477T>C	Intron variant	?	G	A	0.2364	110	0.335	0.332	0.338	0.394	0.287
	4	kgp2887248	89052323	88131171	rs2231142	105152C>A	Gln141Lys	?	A	C	0.1909	110	0.119	0.094	0.013	0.097	0.291		Chamnanphon et al., 2020
	4	rs17013859	89054486	88133334	rs17013859	102989G>A	Intron variant	?	A	G	0.1364	110	0.14	0.019	0.377	0.156	0.003
	4	rs4148155	89054667	88133515	rs4148155	102808T>C	Intron variant	?	G	A	0.1545	110	0.118	0.092	0.01	0.097	0.291
	4	JHU_4.89055162	89055163	88134011	rs3114016	102312C>T	Intron variant	?	G	A	0.03636	110	0.036	0.002	0.13	0	0.001
	4	4:89055379-G-A	89055379	88134227	rs17731538	102096C>T	Intron variant	?	A	G	0.02727	110	0.096	0.203	0.03	0.089	0.078
	4	rs4148153	89056715	88135563	rs4148153	100760C>T	Intron variant	?	A	G	0.1636	110	0.064	0.018	0.005	0.049	0.219
	4	exm412870	89061114	88139962	rs2231137	96361G>A	Val12Met	?	A	G	0.2315	108	0.158	0.061	0.0634568	0.154	0.326
	4	rs4148149	89062285	88141133	rs4148149	95190A>C	Intron variant	?	C	A	0.4727	110	0.429	0.375	0.584	0.391	0.303
	4	rs13137622	89062513	88141361	rs13137622	94962C>A	Intron variant	?	A	C	0.2182	110	0.266	0.315	0.484	0.235	0.003
	4	JHU_4.89062909	89062910	88141758	rs45488894	94565T>A	Intron variant	?	T	A	0.01818	110	0.014	0	0.051	0	0.001
	4	4:89064602-C-T	89064602	88143450	rs3109823	92873G>A	Intron variant	?	G	A	0.3818	110	0.336	0.264	0.609	0.24	0.194
	4	rs6857600	89066075	88144923	rs6857600	91400G>A	Intron variant	?	A	G	0.4727	110	0.307	0.249	0.511	0.308	0.159
	4	4:89066184-A-G	89066184	88145032	rs115055824	91291T>C	Intron variant	?	G	A	0.03636	110	0.008	0	0.03	0	0
	4	rs2622626	89066715	88145563	rs2622626	90760G>T	Intron variant	?	A	C	0.3364	110	0.486	0.472	0.296	0.55	0.647
	4	4:89068455-G-T	89068455	88147303	rs17731799	89020C>A	Intron variant	?	A	C	0.2909	110	0.451	0.395	0.278	0.501	0.647
	4	JHU_4.89070683	89070684	88149532	rs1466480	86791C>T	Intron variant	?	A	G	0.4727	110	0.269	0.132	0.5	0.286	0.159
	4	4:89078924-T-C	89078924	88157772	rs2622604	78551A>G	Intron variant	?	A	G	0.1636	110	0.168	0.237	0.107	0.124	0.199
	4	4:89079632-G-A	89079632	88158480	rs111766106	77843C>T	Intron variant/5'UTR	?	A	G	0.02727	110	0.022	0.002	0.055	0.036	0
	4	JHU_4.89079993	89079994	88158842	rs2231135	77481T>C	Intron variant/5'UTR	?	G	A	0.01818	110	0.033	0.076	0.012	0.05	0
	4	rs3114019	89081441	88160289	rs3114019	76034G>A	Intron variant	?	G	A	0.1545	110	0.161	0.237	0.085	0.113	0.203
	4	rs3114020	89083666	88162514	rs3114020	73809A>G	Intron variant	?	G	A	0.2727	110	0.425	0.396	0.211	0.469	0.632
	4	rs11732936	89090615	88169463	rs11732936	66860T>C	Intron variant	?	G	A	0.3	110	0.424	0.386	0.203	0.479	0.632
	4	rs10011796	89090877	88169725	rs10011796	66598A>G	Intron variant	?	A	G	0.3545	110	0.442	0.388	0.269	0.479	0.634
	4	JHU_4.89093989	89093990	88172838	rs35228269	63485T>C	Intron variant	?	G	A	0.3818	110	0.246	0.189	0.502	0.216	0.073
	4	rs7657441	89094298	88173146	rs7657441	63177A>G	Intron variant	?	G	A	0.1273	110	0.093	0.003	0.338	0	0
	4	rs7658584	89096641	88175489	rs7658584	60834C>T	Intron variant	?	A	G	0.3818	110	0.246	0.189	0.502	0.216	0.073
	4	JHU_4.89097077	89097078	88175926	rs55987521	60397T>A	Intron variant	?	T	A	0.3909	110	0.248	0.189	0.508	0.218	0.073
	4	JHU_4.89097089	89097090	88175938	rs57454797	60385A>G	Intron variant	?	G	A	0.3909	110	0.253	0.189	0.524	0.218	0.073
	4	4:89102017-G-A	89102017	88180865	rs139370979	55458C>T	Intron variant	?	A	G	0.009091	110	0.006	0.001	0.023	0	0
	4	rs2127863	89111468	88190316	rs2127863	46007A>G	Intron variant	?	A	G	0.07273	110	0.102	0.207	0.119	0.074	0
	4	JHU_4.89111946	89111947	88190795	rs75075977	45528T>C	Intron variant	?	G	A	0.009091	110	0.034	0.069	0.008	0.066	0
	4	4:89115818-A-C	89115818	88194666	rs113611770	41657T>G	Intron variant	?	C	A	0.02727	110	0.008	0.001	0.027	0	0
	4	JHU_4.89116558	89116559	88195407	rs77253689	40916C>T	Intron variant	?	A	G	0.04545	110	0.05	0.032	0.035	0.045	0.068
	4	rs10856870	89119659	88198507	rs10856870	37816A>G	Intron variant	?	A	G	0.3182	110	0.339	0.471	0.557	0.298	0.006
	4	rs75048878	89122818	88201666	rs75048878	34657C>A	Intron variant	?	A	C	0.04545	110	0.076	0.204	0.058	0.038	0
	4	4:89122915-G-A	89122915	88201763	rs149056676	34560C>T	Intron variant	?	A	G	0.009091	110	0.00858962	0.006	0.027	0	0
	4	rs77180571	89126434	88205282	rs77180571	31041G>A	Intron variant	?	A	G	0.2091	110	0.128	0.073	0.02	0.107	0.337
	4	rs76212402	89127682	88206530	rs76212402	29793G>A	Intron variant	?	A	G	0.03636	110	0.05	0.031	0.03	0.034	0.084
	4	rs11723264	89129484	88208332	rs11723264	27991C>T	Intron variant	?	G	A	0.3545	110	0.316	0.264	0.699	0.256	0.005
	4	4:89131682-T-G	89131682	88210530	rs115122996	25793A>C	Intron variant	?	C	A	0.009091	110	0.00546872	0.003	0.018	0	0
	4	4:89133737-A-G	89133737	88212585	rs28463190	23738T>C	Intron variant	?	G	A	0.06364	110	0.057	0	0.21	0	0
	4	rs4693935	89139275	88218123	rs4693935	18200T>C	Intron variant	?	A	G	0.3909	110	0.280572	0.281	0.329	0.189	0.333
	4	rs2904185	89139832	88218680	rs2904185	17643G>A	Intron variant	?	A	G	0.3364	110	0.421	0.41	0.183	0.553	0.571
	4	rs9307048	89149570	88228418	rs9307048	7905G>A	Intron variant	?	A	G	0.08182	110	0.122	0.298	0.11	0.058	0
ABCB1	7	kgp13263752	87133307	87503991	rs28364279	214258A>C	3'UTR	?	C	A	0.01818	110	0.007	0	0.027	0	0
(NG_011513.1)	7	kgp341845	87133366	87504050	rs3842	214199A>G	3'UTR	?	G	A	0.3909	110	0.188	0.139	0.164	0.179	0.296
	7	rs28364278	87133386	87504070	rs28364278	214171_214178dup	3'UTR	?	I	D	0.02727	110	0.029	0.004	0.089	0.019	0
	7	kgp13736026	87133413	87504097	rs28364277	214152G>A	3'UTR	?	A	G	0.05455	110	0.03	0	0.111	0	0
	7	rs17064	87133470	87504154	rs17064	214095A>T	3'UTR	?	A	T	0.1364	110	0.061	0.073	0.145	0.001	0
	7	rs28364275	87133538	87504222	rs28364275	214027T>C	3'UTR	?	G	A	0.01818	110	0.022	0.001	0.079	0	0
	7	rs28401816	87136332	87507016	rs28401816	211233A>G	Intron variant	?	G	A	0.09091	110	0.032	0	0.115	0	0
	7	rs6978925	87137015	87507699	rs6978925	210550G>A	Intron variant	?	A	G	0.05455	110	0.184	0.244	0.161	0.131	0.14
	7	rs1882478	87137018	87507702	rs1882478	210547G>A	Intron variant	?	G	A	0.2727	110	0.565	0.737	0.376	0.761	0.439
	7	7:87138511-G-A	87138511	87509195	rs2235048	209054C>T	Intron variant	?	G	A	0.1636	110	0.398	0.519	0.15	0.579	0.399
	7	7:87138532-A-C	87138532	87509216	rs2235047	209033T>G	Intron variant	?	C	A	0.4545	110	0.175	0.019	0.193	0.11	0.421
	7	rs1045642	87138645	87509329	rs1045642	208920T>C	Ile1215=/Ile1145=	?	A	G	0.1636	110	0.395	0.518	0.15	0.575	0.398
	7	exm631739	87138659	87509343	rs2229107	208906T>A	Ser1141Thr	?	T	A	0.07273	110	0.02	0	0.072	0	0
	7	rs10808071	87140808	87511492	rs10808071	206757T>C	Intron variant	?	G	A	0.1545	110	0.185	0.213	0.25	0.185	0.085
	7	rs1002204	87141497	87512181	rs1002204	206068T>G	Intron variant	?	A	C	0.1727	110	0.398	0.513	0.16	0.587	0.396
	7	rs4148751	87143153	87513837	rs4148751	204412A>G	Intron variant	?	G	A	0.4273	110	0.179	0.048	0.216	0.116	0.37
	7	exm631745	87144567	87515251	rs57521326	202998G>A	Asp1088Asn	?	A	G	0.009091	110	0.000886769	0	0.002	0	0
	7	rs4148745	87148265	87518949	rs4148745	199300C>A	Intron variant	?	A	C	0.2364	110	0.097	0.021	0.167	0.052	0.139
	7	7:87148328-C-T	87148328	87519012	rs28401781	199237G>A	Intron variant	?	A	G	0.1364	110	0.147	0.135	0.223	0.164	0.069
	7	7:87149922-C-T	87149922	87520606	rs2235067	197643G>A	Intron variant	?	A	G	0.1636	110	0.134	0.132	0.182	0.154	0.068
	7	7:87152103-A-G	87152103	87522787	rs4148740	195462T>C	Intron variant	?	G	A	0.1909	110	0.145	0.134	0.2	0.18	0.069
	7	7:87153585-A-C	87153585	87524269	rs10280101	193980T>G	Intron variant	?	C	A	0.1909	110	0.145	0.134	0.2	0.18	0.069
	7	rs10225473	87154646	87525330	rs10225473	192919T>C	Intron variant	?	G	A	0.1636	110	0.137	0.131	0.177	0.177	0.069
	7	rs35280822	87155595	87526279	rs35280822	191970C>T	Intron variant	?	A	G	0.1364	110	0.245	0.413	0.175	0.164	0.161
	7	7:87157051-G-A	87157051	87527735	rs7787082	190514C>T	Intron variant	?	G	A	0.2818	110	0.622	0.822	0.349	0.754	0.565
	7	JHU_7.87159518	87159519	87530203	rs28401769	188046T>G	Intron variant	?	C	A	0.03636	110	0.015	0.001	0.052	0	0
	7	7:87160561-A-G	87160561	87531245	rs2032583	187004T>C	Intron variant	?	G	A	0.1909	110	0.145	0.134	0.203	0.18	0.069
	7	exm631775	87160618	87531302	rs2032582	186947T>G	Ser893Ala	?	A	C	0.1273	110	0.334	0.41	0.02	0.592	0.398
	7	rs28381967	87160789	87531473	rs28381967	186776A>G	Ile836Val	?	G	A	0.009091	110	0.00109074	0	0.005	0	0
	7	7:87161049-T-C	87161049	87531733	rs4148739	186516A>G	Intron variant	?	G	A	0.1909	110	0.145	0.134	0.203	0.18	0.069
	7	7:87161520-T-C	87161520	87532204	rs11983225	186045A>G	Intron variant	?	G	A	0.1909	110	0.146	0.134	0.203	0.181	0.069
	7	JHU_7.87162301	87162302	87532986	rs149203585	185263G>T	Intron variant	?	A	C	0.009091	110	0.006	0	0.02	0	0
	7	rs11760837	87163016	87533700	rs11760837	184549A>G	Intron variant	?	G	A	0.1909	110	0.145	0.134	0.203	0.18	0.069
	7	rs10248420	87164986	87535670	rs10248420	182579T>C	Intron variant	?	A	G	0.3273	110	0.653	0.824	0.455	0.756	0.565
	7	7:87165750-C-T	87165750	87536434	rs2235040	181815G>A	Intron variant	?	A	G	0.1636	110	0.14	0.133	0.182	0.18	0.069
	7	7:87169356-C-T	87169356	87540040	rs12720067	178209G>A	Intron variant	?	A	G	0.08182	110	0.09	0.131	0.004	0.176	0.068
	7	rs28381940	87170163	87540847	rs28381940	177402T>C	Intron variant	?	G	A	0.07273	110	0.0304992	0	0.104979	0	0
	7	7:87171152-T-C	87171152	87541836	rs4148737	176413A>G	Intron variant	?	G	A	0.3636	110	0.379	0.437	0.472	0.217	0.301
	7	rs6961419	87172136	87542820	rs6961419	175429A>G	Intron variant	?	G	A	0.3636	110	0.379	0.437	0.472	0.217	0.3
	7	7:87173667-A-T	87173667	87544351	rs1922242	173898T>A	Intron variant	?	T	A	0.3636	110	0.379	0.437	0.472	0.217	0.301
	7	exm631800	87174198	87544882	rs35023033	173367C>T	Arg669Cys	?	A	G	0.03636	110	0.0024059	0	0.00838002	0	0
	7	JHU_7.87174389	87174390	87545074	rs28381920	173175C>T	Intron variant	?	A	G	0.009091	110	0.024	0.069	0.028	0	0
	7	JHU_7.87178054	87178055	87548739	rs28381905	169510G>A	Intron variant	?	A	G	0.02727	110	0.00677754	0.003	0.024	0	0
	7	rs2235033	87179143	87549827	rs2235033	168422T>C	Intron variant	?	G	A	0.4909	110	0.465	0.493	0.515	0.404	0.375
	7	7:87179601-A-G	87179601	87550285	rs1128503	167964T>C	Gly412=	?	A	G	0.3273	110	0.416	0.416	0.136	0.587	0.627
	7	rs10276036	87180198	87550882	rs10276036	167367G>A	Intron variant	?	G	A	0.3364	110	0.432	0.416	0.194	0.587	0.627
	7	JHU_7.87182036	87182037	87552721	rs10225464	165528C>T	Intron variant	?	G	A	0.3364	110	0.433	0.416	0.194	0.587	0.628
	7	rs1922240	87183354	87554038	rs1922240	164211A>G	Intron variant	?	G	A	0.2182	110	0.273	0.32	0.204	0.202	0.294
	7	JHU_7.87185697	87185698	87556382	rs114106519	161867A>G	Intron variant	?	G	A	0.009091	110	0.013	0.013	0.017	0.011	0
	7	rs2235023	87190452	87561136	rs2235023	157113G>A	Intron variant	?	A	G	0.1455	110	0.106	0.092	0.3	0.009	0
	7	exm631854	87190625	87561309	rs36008564	156940A>G	Ile261Val	?	G	A	0.02727	110	0.00587254	0.003	0.019	0	0
	7	rs4148734	87193597	87564281	rs4148734	153968C>T	Intron variant	?	A	G	0.09091	110	0.175	0.297	0.026	0.149	0.164
	7	rs1024409	87198367	87569051	rs1024409	149198C>T	Intron variant	?	A	G	0.07273	110	0.078	0.022	0.157	0.041	0.074
	7	7:87199564-C-A	87199564	87570248	rs2235015	148001G>T	Intron variant	?	A	C	0.2636	110	0.216	0.207	0.392	0.181	0.071
	7	JHU_7.87201495	87201496	87572180	rs114403436	146069A>C	Intron variant	?	C	A	0.2636	110	0.2133	0.205	0.3858	0.18	0.0714
	7	JHU_7.87203206	87203207	87573891	rs369341710	144358C>A	Intron variant	?	A	C	0.01818	110	0.02	0.002	0.073	0	0
	7	rs1989830	87205663	87576347	rs1989830	141902T>C	Intron variant	?	A	G	0.1364	110	0.225	0.365	0.318	0.178	0.027
	7	rs73387255	87211486	87582170	rs73387255	136079C>T	Intron variant	?	A	G	0.1818	110	0.167617	0.137	0.197	0.125	0.127
	7	JHU_7.87214274	87214275	87584959	rs7809208	133290T>G	Intron variant	?	A	C	0.4455	110	0.715	0.878	0.548	0.833	0.684
	7	JHU_7.87214276	87214277	87584961	rs189269809	133288T>G	Intron variant	?	C	A	0.05455	110	0.049	0.011	0.101	0.018	0.05
	7	exm2266441	87220886	87591570	rs3789243	126679T>C	Intron variant	?	A	G	0.4455	110	0.463	0.529	0.542	0.324	0.394
	7	rs1858923	87221216	87591900	rs1858923	126349T>C	Intron variant	?	G	A	0.2091	110	0.386	0.448	0.078	0.652	0.477
	7	rs17327747	87223963	87594647	rs17327747	123602G>A	Intron variant	?	A	G	0.009091	110	0.023	0.039	0.017	0.032	0.002
	7	7:87230193-A-G	87230193	87600877	rs3213619	117372T>C	Intron variant/5'UTR	?	G	A	0.1273	110	0.054	0.039	0.0846291	0.036	0.054
	7	7:87230435-T-C	87230435	87601119	rs2188524	117130A>G	Intron variant	?	G	A	0.04545	110	0.021	0	0.00115797	0.002	0.099
	7	7:87230454-T-A	87230454	87601138	rs28381800	117111A>T	Intron variant	?	A	T	0.05455	110	0.008	0	0.027	0	0
	7	7:87230540-A-G	87230540	87601224	rs28381799	117025T>C	Intron variant	?	G	A	0.009091	110	0.002	0	0.006	0	0
	7	7:87230668-C-T	87230668	87601352	rs35462624	116897G>A	Intron variant	?	A	G	0.01818	110	0.00193368	0	0.008	0	0
	7	rs12720464	87231853	87602537	rs12720464	115712G>A	Intron variant	?	A	G	0.1273	110	0.058	0.002	0.02	0.011	0.231
	7	rs4148732	87234049	87604733	rs4148732	113516A>G	Intron variant	?	G	A	0.1364	110	0.118	0.116	0.025	0.123	0.143
	7	rs34800935	87256602	87627286	rs34800935	90963A>G	Intron variant	?	G	A	0.1545	110	0.252	0.246	0.007	0.392	0.442
	7	rs138304391	87276336	87647020	rs138304391	71229T>C	Intron variant/RUNDC3B	?	G	A	0.009091	110	0.006	0.002	0	0.01	0.00980015
	7	rs10267099	87278760	87649444	rs10267099	68805C>T	Intron variant/RUNDC3B	?	G	A	0.03636	110	0.143	0.25	0.161	0.134	0.021
	7	rs7810499	87286446	87657130	rs7810499	61119A>G	Intron variant/RUNDC3B	?	G	A	0.03636	110	0.029	0.068	0.05	0	0
	7	rs6951067	87288324	87659008	rs6951067	59241A>G	Intron variant/RUNDC3B	?	G	A	0.3455	110	0.174	0.06	0.391	0.06	0.136
	7	JHU_7.87288744	87288745	87659429	rs115247416	58820C>A	Intron variant/RUNDC3B	?	A	C	0.009091	110	0.007	0.002	0.023	0	0
	7	rs6465118	87330423	87701107	rs6465118	17142C>T	Intron variant/RUNDC3B	?	A	G	0.1364	110	0.102	0.06	0.175	0.059	0.084
	7	7:87342586-A-G	87342586	87713270	rs3747802	4979T>C	5'UTR/RUNDC3B	?	G	A	0.04545	110	0.011	0.002	0	0.001	0.052
CYP3A5	7	rs15524	99245914	99648291	rs15524	36708T>C	3'UTR	Many	A	G	0.4364	110	0.652	0.94	0.306	0.662	0.701
(NG_007938.2)	7	exm-IND7-99088329	99250393	99652770	rs41303343	32228_32229insT	Thr346fs	*7	I	D	0.1182	110	0.032	0	0.118	0	0
	7	kgp13278553	99257946	99660323	rs139485693	24676C>G	Intron variant	x	C	G	0.05455	110	0.002	0	0	0	0.009
	7	kgp13680859	99260919	99663296	rs10256106	21703G>C	Intron variant	x	G	C	0.1091	110	0.038	0.003	0.129	0	0
	7	kgp13734757	99262805	99665182	rs28383472	19817A>G	Pro218=	*1.005	G	A	0.02727	110	0.012	0	0.043	0	0
	7	rs10264272	99262835	99665212	rs10264272	19787G>A	Splice defect	*6	A	G	0.1091	110	0.045	0.003	0.154	0	0		Sortica et al., 2016
	7	exm2266552	99266318	99668695	rs4646450	16304C>T	Intron variant	x	G	A	0.4074	108	0.533	0.835	0.035	0.602	0.7
	7	exm638644	99269397	99671774	rs6977165	13225A>G	Intron variant	x	G	A	0.1909	110	0.065	0.031	0.146	0.036	0.03
	7	rs8175345	99270318	99672695	rs8175345	12304C>T	Intron variant	x	A	G	0.04545	110	0.022	0	0.081	0	0
	7	7:99270539-C-T	99270539	99672916	rs776746	12083A>G	Splice defect	*3	G	A	0.4091	110	0.621	0.943	0.18	0.668	0.713		Sortica et al., 2016
	7	rs4646441	99277538	99679915	rs4646441	5084T>C	5'UTR	x	G	A	0.08182	110	<0.001	0	0	0	0.001
CYP3A4	7	kgp13433342	99354661	99757038	rs28988606	32148C>G	3'UTR	x	C	G	0.009091	110	0.012	0.001	0.04	0	0
(NG_008421.1)	7	kgp13365733	99355185	99757562	rs28988603	31624T>G	3'UTR	x	C	A	0.009091	110	0.01151	0.001	0.04	0	0
	7	rs3735451	99355975	99758352	rs3735451	30834A>G	Intron variant	x	A	G	0.3455	110	0.597	0.901	0.186	0.627	0.682
	7	rs17161886	99356324	99758701	rs17161886	30485T>G	Intron variant	x	C	A	0.07273	110	0.108	0.001	0.378	0.017	0
	7	7:99360870-G-A	99360870	99763247	rs4646440	25939C>T	Intron variant	x	A	G	0.3273	110	0.149	0.003	0.077	0.263	0.216
	7	rs2242480	99361466	99763843	rs2242480	25343G>A	Intron variant	Many	G	A	0.1852	108	0.578	0.918	0.15	0.629	0.732
	7	exm638777	99361626	99764003	rs28371759	25183T>C	Leu293Pro	*18	G	A	0.1545	110	0.002	0	0	0	0.011
	7	JHU_7.99365641	99365642	99768019	rs28988585	21167A>T	Intron variant	x	A	T	0.009091	110	0.011	0.001	0.041	0	0
	7	7:99365719-A-G	99365719	99768096	rs2246709	21090T>C	Intron variant	x	G	A	0.4636	110	0.368	0.272	0.356	0.387	0.395
	7	7:99365943-C-A	99365943	99768320	rs2687116	20866G>T	Intron variant	x	C	A	0.3364	110	0.22	0.03	0.721	0.045	0.005
	7	7:99366316-G-A	99366316	99768693	rs35599367	20493C>T	Splice defect	*22, *37	A	G	0.009091	110	0.015	0.05	0.001	0.006	0
	7	rs2738258	99370493	99772870	rs2738258	16316A>G	Intron variant	x	A	G	0.2091	110	0.117	0.003	0.408	0.021	0
	7	rs7801671	99376906	99779283	rs7801671	9903G>T	Intron variant	x	A	C	0.07273	110	0.062	0.002	0.217	0.002495	0
CYP2C19	10	10:96525865-G-A	96525865	94766108	rs12768009	8428G>A	Intron variant	x	A	G	0.1455	110	0.237	0.145	0.18	0.37	0.368
(NG_008384.3)	10	rs7916649	96534584	94774827	rs7916649	17147G>A	Intron variant	x	A	G	0.3818	110	0.509	0.444	0.662	0.621	0.424
	10	kgp29673168	96535152	94775395	rs145119820	17715G>A	Val113Ile	x	A	G	0.02727	110	0.002	0	0.008	0	0
	10	rs4388808	96536056	94776299	rs4388808	18619A>G	Intron variant	x	G	A	0.4091	110	0.2	0.174	0.154	0.13	0.387
	10	exm843929	96540410	94780653	rs4986893	22973G>A	Trp212X	*3	A	G	0.02727	110	0.014	0	0.002	0.012	0.056
	10	rs4244285	96541616	94781859	rs4244285	24179G>A	Splice defect	*2	A	G	0.1182	110	0.221	0.145	0.17	0.358	0.312307		Ariffin et al., 2019; Chamnanphon et al., 2020
	10	exm-rs12767583	96547463	94787706	rs12767583	30026C>T	Intron variant	x	A	G	0.1182	110	0.221	0.145	0.169	0.358	0.313
	10	exm2267120	96563757	94804000	rs4494250	46320G>A	Intron variant	x	A	G	0.02727	110	0.224	0.333	0.021	0.233	0.171
	10	rs1853205	96575069	94815312	rs1853205	57632C>G	Intron variant	x	G	C	0.1455	110	0.233	0.145	0.213	0.358	0.312
	10	rs10786172	96581094	94821337	rs10786172	63657A>G	Intron variant	x	G	A	0.08182	110	0.23	0.336	0.043	0.233	0.169
	10	rs28399513	96602398	94842641	rs28399513	84961T>A	Intron variant	x	A	T	0.1182	110	0.221	0.145	0.17	0.358	0.312
	10	10:96602623-GA	96602623	94842866	rs3758581	85186A>G	Ile331Val	Many incl *1	A	G	0.009259	108	0.049	0.069	0.002	0.109	0.04
	10	rs11592737	96603414	94843657	rs11592737	85977A>G	Intron variant	x	G	A	0.1636	110	0.156	0.225	0.246	0.136	0.015
	10	JHU_10.96609983	96609984	94850227	rs17885567	92547C>T	Intron variant	x	A	G	0.02727	110	0.0150987	0	0.056	0	0
	10	rs35709381	96614725	94854968	rs35709381	97288G>T	3'UTR	x	A	C	0.1455	110	0.233	0.145	0.213	0.358	0.311605
CYP2C9	10	10:96698690-T-C	96698690	94938933	rs9332104	5776T>C	Intron variant	x	G	A	0.1273	110	0.144	0.223	0.202	0.136	0.016
(NG_008385.2)	10	JHU_10.96699788	96699789	94940032	rs9332107	6875G>A	Intron variant	x	A	G	0.009091	110	0.043	0.094	0.004	0.079	0.001
	10	10:96701850-T-C	96701850	94942093	rs9332120	8936T>C	Intron variant	x	G	A	0.1273	110	0.144	0.223	0.203	0.136	0.015
	10	exm-rs4086116	96707202	94947445	rs4086116	14288C>T	Intron variant	x	A	G	0.1273	110	0.164	0.198	0.209	0.155	0.088
	10	exm844029	96708974	94949217	rs2256871	16060A>G	His251Arg	*9	G	A	0.06364	110	0.022	0.001	0.082	0	0
	10	JHU_10.96712077	96712078	94952321	rs74150726	19164A>T	Intron variant	x	T	A	0.009091	110	0.007	0	0.025	0	0
	10	10:96725535-A-C	96725535	94965778	rs4917639	32621A>C	Intron variant	x	C	A	0.1273	110	0.164	0.198	0.209	0.155	0.088
	10	JHU_10.96730063	96730064	94970307	rs12573036	37150C>T	Intron variant	x	A	G	0.06364	110	0.179	0.164	0.016	0.342	0.307
	10	rs9332168	96731292	94971535	rs9332168	38378C>T	Intron variant	x	A	G	0.1364	110	0.146	0.224	0.208	0.137	0.015
	10	10:96732097-A-G	96732097	94972340	rs9332174	39183A>G	Intron variant	x	G	A	0.1364	110	0.147	0.223	0.214	0.136	0.016
	10	rs1856908	96732731	94972974	rs1856908	39817T>G	Intron variant	x	A	C	0.4909	110	0.392	0.364	0.222	0.349	0.565
	10	exm-rs10509680	96734339	94974582	rs10509680	41425G>T	Intron variant	x	A	C	0.009091	110	0.052	0.073	0.011	0.115	0.034
	10	kgp22009765	96740981	94981224	rs28371685	48067C>T	Arg335Trp	*11	A	G	0.02727	110	0.00701549	0.002	0.024	0.001	0		Sortica et al., 2016
	10	exm844046	96741053	94981296	rs1057910	48139A>C	Ile359Leu	*3	C	A	0.009091	110	0.0494537	0.073	0.002	0.109	0.034		Sortica et al., 2016
	10	rs9332220	96743943	94984186	rs9332220	51029G>A	Intron variant	x	A	G	0.1273	110	0.164	0.198	0.21	0.155	0.088
	10	JHU_10.96744250	96744251	94984494	rs9332225	51337T>C	Intron variant	x	G	A	0.009091	110	0.005	0	0.018	0	0
	10	JHU_10.96744731	96744732	94984975	rs114628972	51818C>T	Intron variant	x	A	G	0.009091	110	0.05	0.073	0.009	0.108	0.033
	10	10:96748495-A-T	96748495	94988738	rs1934969	55581A>T	Intron variant	x	T	A	0.3818	110	0.555	0.586	0.673	0.634	0.41
	10	rs2017319	96748635	94988878	rs2017319	55721C>T	Ala441=	*1.009	A	G	0.009091	110	0.034	0.002	0.12	0	0
	10	kgp537287	96748737	94988980	rs1057911	55823A>T	Gly475=	Many	T	A	0.009091	110	0.049	0.073	0.005	0.109	0.033
	10	kgp21913328	96748873	94989116	rs9332241	55959C>T	3'UTR	*8.003, *8.004	A	G	0.009091	110	0.01	0	0.038	0	0
	10	kgp9237233	96748893	94989136	rs9332242	55979C>G	3'UTR	*2.004	G	C	0.02727	110	0.048	0.124	0.008	0.035	0.000577145
CYP2C8	10	kgp29854121	96796796	95037039	rs28399518	37459C>T	3'UTR	*1.012	A	G	0.02727	110	0.006	0	0.022	0	0
(NG_007972.1)	10	rs1058932	96796861	95037104	rs1058932	37394C>T	3'UTR	Many	A	G	0.3	110	0.301	0.198	0.366	0.35	0.38
	10	rs11572177	96797270	95037513	rs11572177	36985A>G	Intron variant	x	G	A	0.2364	110	0.247	0.331	0.333	0.259	0.073
	10	rs1934953	96797470	95037713	rs1934953	36785G>A	Intron variant	x	G	A	0.3818	110	0.357	0.313	0.184	0.33	0.547
	10	rs11572172	96797752	95037995	rs11572172	36503A>C	Intron variant	x	C	A	0.07273	110	0.072	0.067	0.163	0.029	0.018
	10	exm-rs1934951	96798548	95038791	rs1934951	35707G>A	Intron variant	x	A	G	0.3	110	0.3	0.198	0.361	0.35	0.38
	10	kgp22047705	96798715	95038958	rs148515896	35540C>T	Gly410=	*1.007	A	G	0.009091	110	0.005	0	0	0	0.024
	10	exm844097	96798749	95038992	rs10509681	35506A>G	Lys399Arg	*3	G	A	0.02727	110	0.046	0.118	0.008	0.03	0.00057648
	10	10:96811045-G-C	96811045	95051288	rs1113129	23210C>G	Intron variant	x	C	G	0.3545	110	0.351	0.238	0.481	0.378	0.38
	10	JHU_10.96813942	96813943	95054186	rs59825959	20312T>A	Intron variant	x	T	A	0.1	110	0.105	0.056	0.218	0.062	0.071
	10	rs11572103	96818106	95058349	rs11572103	16149A>T	Ile269Phe	*2	A	T	0.09091	110	0.055	0.004	0.189	0.012	0		Silvino et al., 2016; Sortica et al., 2016
	10	rs11572101	96818362	95058605	rs11572101	15893T>C	Intron variant	x	G	A	0.2091	110	0.246	0.194	0.177	0.337	0.38
	10	rs3752988	96824883	95065126	rs3752988	9372A>G	Intron variant	x	G	A	0.3818	110	0.397	0.356	0.489	0.408	0.381
	10	exm844157	96826966	95067209	rs11572081	7289G>A	Lys160=	*1.008, *1.018, *17.001	A	G	0.01818	110	0.046	0.002	0.164	0	0
	10	10:96827030-CT	96827030	95067273	rs11572080	7225G>A	Arg139Lys	*3	A	G	0.02727	110	0.046	0.118	0.008	0.03	0.000577812		Silvino et al., 2016; Sortica et al., 2016
	10	rs11572076	96827150	95067393	rs11572076	7105G>A	Intron variant	x	A	G	0.09091	110	0.053	0.004	0.183	0.012	0
	10	10:96827178-TC	96827178	95067421	rs2275622	7077A>G	Intron variant	x	A	G	0.3727	110	0.354	0.316	0.168	0.33	0.547
	10	rs1934956	96828160	95068403	rs1934956	6095A>G	Intron variant	x	A	G	0.4	110	0.258	0.142	0.228	0.18	0.476
	10	10:96828323-TC	96828323	95068566	rs2071426	5932A>G	Intron variant	x	G	A	0.2	110	0.2	0.283	0.256	0.22	0.059
	10	kgp21944904	96829245	95069488	rs11572066	5010A>G	5'UTR	*1.018, *16.001	C	A	0.009091	110	<0.001	0	0.002	0	0
CYP2E1	10	kgp5418137	135340868	133527364	rs200292747	5002T>C	5'UTR	?	A	G	0.04545	110	0.138	0.105	0.78	0.358	0.033
(NG_ 008383.1)	10	kgp29806682	135342101	133528597	rs28371740	6235G>A	Ser98=	?	A	G	0.01818	110	0.004	0.001	0.014	0	0
	10	rs8192769	135342583	133529079	rs8192769	6717C>T	Intron variant	?	A	G	0.02727	110	0.071	0.057	0.035	0.165	0.059
	10	rs915906	135343738	133530234	rs915906	7872C>T	Intron variant	?	A	G	0.4273	110	0.605	0.823	0.236	0.632	0.732
	10	JHU_10.135344005	135344006	133530502	rs9919379	8140T>C	Intron variant	?	G	A	0.1	110	0.049	0.023	0.148	0.01	0
	10	rs41299422	135344381	133530877	rs41299422	8515G>A	Intron variant	?	A	G	0.1455	110	0.049	0.033	0.133	0.011	0
	10	rs8192772	135344711	133531207	rs8192772	8845T>C	Intron variant	?	G	A	0.1545	110	0.178	0.078	0.138	0.287	0.262
	10	exm868747	135345675	133532171	rs6413419	9809G>A	Val179Ile	*4	A	G	0.1818	110	0.077	0.031	0.238	0.011	0
	10	JHU_10.135345997	135345998	133532494	rs12254222	10132C>T	Intron variant	?	A	G	0.1759	108	0.076	0.031	0.231	0.012	0
	10	kgp1074564	135347397	133533893	rs915909	11531C>T	Ile321=	(in Exon 6)	A	G	0.06364	110	0.027	0	0.1	0	0
	10	rs743534	135349226	133535722	rs743534	13360C>A	Intron variant	?	A	C	0.4818	110	0.695	0.874	0.316	0.833	0.793
	10	kgp29696689	135350643	133537139	rs146344065	14777C>G	Pro348=	?	G	C	0.009091	110	0.006	0	0.02	0	0
	10	10:135351137-G-C	135351137	133537633	rs2070676	15271G>C	Intron variant	*1B	C	G	0.4909	110	0.693	0.872	0.309	0.832	0.795
	10	rs2515641	135351362	133537858	rs2515641	15496C>T	Phe421=	(in Exon 8)	G	A	0.4909	110	0.701	0.872	0.339	0.831601	0.795
	10	exm868796	135352356	133538852	rs28969387	16490A>T	His457Leu	x	T	A	0.009091	110	0.015	0	0.055	0	0
	10	kgp21574411	135352490	133538986	rs7081484	16624C>T	3'UTR	?	A	G	0.1019	108	0.067	0.019	0.219	0.001	0
	10	kgp5910402	135352509	133539005	rs2480257	16643T>A	3'UTR	?	T	A	0.3818	110	0.497	0.235	0.871	0.38	0.474
	10	kgp21973149	135352520	133539016	rs11101812	16654T>C	3'UTR	?	G	A	0.02727	110	0.017	0	0.063	0	0
	10	kgp21790543	135352600	133539096	rs12164704	16734A>C	3'UTR	?	C	A	0.009091	110	0.015	0	0.055	0	0
SLCO2B1	11	rs2851069	74862356	75151311	rs2851069	5325T>C	5'UTR	?	G	A	0.3	110	0.377	0.622	0.144	0.555	0.268
(NG_027921.1)	11	kgp5714134	74862391	75151346	rs1944612	5360A>G	5'UTR	?	A	G	0.01818	110	0.024	0	0	0.004	0.116
	11	rs2712819	74866107	75155062	rs2712819	9076G>A	Intron variant	?	G	A	0.3455	110	0.231	0.161	0.321	0.093	0.377
	11	rs17133760	74870295	75159250	rs17133760	13264T>C	Intron variant	?	G	A	0.02727	110	0.031	0.027	0.061	0.0302403	0.009
	11	rs11236359	74870884	75159839	rs11236359	13853A>G	Intron variant/5'UTR	?	A	G	0.3545	110	0.286	0.189	0.472	0.124	0.368665
	11	JHU_11.74871464	74871465	75160420	rs115859987	14434C>T	Intron variant	?	A	G	0.009091	110	0.005	0	0.02	0	0
	11	exm941361	74873726	75162681	rs56837383	16695C>T	Pro15Ser	?	A	G	0.009091	110	0.003	0	0.009	0	0
	11	11:74873755-GCACAGAAAA-G	74873755	75162710	rs60113013	16728_16736del	Glu26_Thr28del	?	D	I	0.04545	110	0.039	0.017	0.002	0.047	0.105
	11	rs1109407	74876951	75165906	rs1109407	19920G>A	Pro135Pro	?	A	G	0.06364	110	0.036	0.002	0.127	0	0
	11	exm941400	74880370	75169325	rs35199625	23339G>A	Val201Met	?	A	G	0.03636	110	0.026	0.011	0.001	0.041	0.0627413
	11	JHU_11.74881512	74881513	75170468	rs142442163	24482G>A	Intron variant	?	A	G	0.01818	110	0.01	0	0.038	0	0
	11	rs1789694	74881682	75170637	rs1789694	24651C>T	Intron variant	?	G	A	0.4455	110	0.332	0.209	0.555	0.14	0.434
	11	exm941422	74883577	75172532	rs12422149	26546G>A	Arg 312Gln (Arg290Gln)	?	A	G	0.1364	110	0.21	0.095	0.0917081	0.263	0.32		Sortica et al., 2017
	11	JHU_11.74887039	74887040	75175995	rs1612859	30009C>T	Intron variant	?	G	A	0.2727	110	0.417	0.306	0.38	0.438	0.456
	11	JHU_11.74887288	74887289	75176244	rs115881705	30258T>C	Intron variant	?	G	A	0.02727	110	0.013	0	0.05	0	0
	11	rs3824903	74895090	75184045	rs3824903	38059A>C	Intron variant	?	C	A	0.3364	110	0.249	0.022	0.429	0.034	0.407
	11	rs112455521	74900308	75189263	rs112455521	43277G>A	Intron variant	?	A	G	0.05455	110	0.058	0.014	0.16	0.012	0.037
	11	exm941454	74907582	75196537	rs2306168	50551C>T	Ser486Phe	?	A	G	0.2273	110	0.18	0.02	0.374	0.059	0.261
	11	JHU_11.74912500	74912501	75201456	rs116211275	55470A>G	Intron variant	?	G	A	0.01818	110	0.00944612	0	0.034	0.000623701	0
	11	kgp12810251	74915586	75204541	rs57141326	58555G>A	Val697=	?	A	G	0.02727	110	0.016	0	0.062	0	0
	11	rs3781727	74916021	75204976	rs3781727	58990T>C	3'UTR	?	G	A	0.1818	110	0.106	0.008	0.128	0.057	0.245
	11	kgp4375382	74916346	75205301	rs41298117	59315C>G	3'UTR	?	G	C	0.09091	110	0.095	0.031	0.267	0.027	0.037
	11	kgp10284256	74916695	75205650	rs1801906	59664T>C	3'UTR	?	G	A	0.2636	110	0.2	0.039	0.391	0.084	0.283
	11	kgp2824847	74916847	75205802	rs41298121	59816T>C	3'UTR	?	G	A	0.2636	110	0.212	0.04	0.434	0.084	0.283
	11	rs17133818	74917011	75205966	rs17133818	59980C>T	3'UTR	?	A	G	0.1636	110	0.102	0.008	0.112	0.057	0.246
SLCO1B1	12	rs2010668	21294293	21141359	rs2010668	15166T>G	Intron variant	x	A	C	0.1091	110	0.0992289	0.065	0.208	0.024	0.108905
(NG_011745.1)	12	12:21294795-A-T	21294795	21141861	rs12812795	15668A>T	Intron variant	x	T	A	0.02727	110	0.034	0.048	0.036	0.01	0.002
	12	rs11045802	21312320	21159386	rs11045802	33193T>G	Intron variant	x	C	A	0.1019	108	0.073	0.094	0.01	0.089	0.131
	12	rs981262	21312510	21159576	rs981262	33383G>A	Intron variant	x	A	G	0.4727	110	0.403	0.409	0.41	0.235	0.588
	12	JHU_12.21315521	21315522	21162588	rs976754	36395A>G	Intron variant	x	G	A	0.3182	110	0.149	0.09	0.063	0.137	0.383
	12	JHU_12.21317328	21317329	21164395	rs74068928	38202A>G	Intron variant	x	G	A	0.009091	110	0.00424911	0	0.016	0	0
	12	rs76595724	21317599	21164665	rs76595724	38472T>C	Intron variant	n/a	G	A	0.06364	110	0.065	0.001	0.237	0	0
	12	rs4149032	21317791	21164857	rs4149032	38664C>T	Intron variant	x	G	A	0.3636	110	0.464	0.66	0.266	0.492	0.404
	12	12:21320501-C-T	21320501	21167567	rs73062310	41374C>T	Intron variant	x	A	G	0.01818	110	0.008	0.016	0.002	0.006	0
	12	JHU_12.21322865	21322866	21169932	rs11045815	43739C>G	Intron variant	x	G	C	0.1909	110	0.308	0.486	0.051	0.464	0.243
	12	12:21324661-G-A	21324661	21171727	rs150980755	45534G>A	Intron variant	x	A	G	0.009091	110	0.004	0	0.014	0	0
	12	12:21327740-C-A	21327740	21174806	rs4149036	48613C>A	Intron variant	x	C	A	0.4545	110	0.646	0.776	0.444	0.837	0.501
	12	exm988933	21329738	21176804	rs2306283	50611A>G	Asn130Asp	Many incl *14, *15	A	G	0.2636	110	0.378	0.597	0.182	0.453	0.238		Sortica et al., 2017
	12	exm988936	21329813	21176879	rs11045819	50686C>A	Pro155Thr	Many incl *14	A	C	0.02727	110	0.065	0.144	0.06	0.03	0.003		Sortica et al., 2017
	12	exm988938	21329832	21176898	rs77271279	50705G>T	Splice defect	*41	A	C	0.02727	110	0.00861354	0	0.034	0	0
	12	rs4149050	21330988	21178054	rs4149050	51861T>C	Intron variant	x	A	G	0.4545	110	0.633	0.749	0.433	0.830916	0.5
	12	exm988942	21331549	21178615	rs4149056	52422T>C	Val174Ala	Many incl *5, *15	G	A	0.08182	110	0.088	0.161	0.014	0.043	0.123		Sortica et al., 2017
	12	rs4149057	21331599	21178665	rs4149057	52472T>C	Leu191=	Many	G	A	0.2182	110	0.367	0.607	0.144	0.453	0.243
	12	exm2271695	21331625	21178691	rs2291075	52498C>T	Phe199=	Many	G	A	0.4455	110	0.584	0.603	0.44	0.799	0.489
	12	exm988956	21331891	21178957	rs79135870	52764A>G	Ile222Val	*30	G	A	0.009091	110	0.004	0	0.015	0.000413736	0
	12	rs4762698	21332843	21179909	rs4762698	53716A>G	Intron variant	x	A	G	0.1364	110	0.112	0.109	0.26	0.026	0
	12	rs6487213	21333266	21180332	rs6487213	54139C>T	Intron variant	x	G	A	0.3	110	0.405	0.573	0.305	0.449	0.245
	12	rs1000691	21333426	21180492	rs1000691	54299G>A	Intron variant	x	A	G	0.1636	110	0.187	0.031	0.182	0.312	0.249
	12	rs999278	21333651	21180717	rs999278	54524C>A	Intron variant	x	A	C	0.1818	110	0.302	0.463	0.081	0.423	0.243
	12	JHU_12.21335569	21335570	21182636	rs190981734	56443A>C	Intron variant	x	C	A	0.009259	108	0.0061877	0	0.022	0	0
	12	JHU_12.21349656	21349657	21196723	rs11045850	70530A>C	Intron variant	x	C	A	0.02727	110	0.016	0	0.027	0.044	0
	12	exm988983	21349885	21196951	rs11045852	70758A>G	Ile245Val	Many	G	A	0.02727	110	0.016	0	0.027	0.044	0
	12	kgp19005883	21350034	21197100	rs11045854	70907G>A	Leu294=	*43, *44	A	G	0.02727	110	0.016	0	0.027	0.044	0
	12	rs4149063	21350790	21197856	rs4149063	71663G>T	Intron variant	x	A	C	0.2273	110	0.228	0.062	0.256	0.364	0.287
	12	rs1564364	21354494	21201560	rs1564364	75367T>C	Intron variant	x	G	A	0.1818	110	0.308	0.49	0.056	0.416	0.231
	12	12:21355537-G-A	21355537	21202603	rs11045859	76410G>A	Val416=	Many	A	G	0.02727	110	0.037	0	0.1	0.047	0
	12	12:21357359-A-G	21357359	21204425	rs76908577	78232A>G	Intron variant	x	G	A	0.01818	110	0.028	0.075	0.017	0.014	0
	12	exm989020	21358933	21205999	rs59502379	79806G>C	Gly488Ala	*9, *31	C	G	0.009091	110	0.011	0	0.041	0	0
	12	exm989023	21358965	21206031	rs74064213	79838A>G	Ile499Val	*43, *44	G	A	0.02727	110	0.007	0	0.024	0	0
	12	rs11045863	21361868	21208934	rs11045863	82741C>T	Intron variant	x	A	G	0.02727	110	0.078	0.167	0.033	0.109	0.003
	12	exm-rs4363657	21368722	21215788	rs4363657	89595T>C	Intron variant	x	G	A	0.4273	110	0.215	0.191	0.172	0.082	0.454
	12	rs4149068	21369191	21216257	rs4149068	90064T>C	Intron variant	x	G	A	0.1273	110	0.134	0.036	0.011	0.255	0.288
	12	rs4149069	21369326	21216392	rs4149069	90199G>C	Intron variant	x	C	G	0.2818	110	0.564	0.448	0.643	0.456	0.749
	12	12:21372344-A-G	21372344	21219410	rs11045872	93217A>G	Intron variant	x	G	A	0.02727	110	0.078	0.166	0.033	0.11	0.003
	12	rs4149080	21377559	21224625	rs4149080	98432G>C	Intron variant	x	C	G	0.4273	110	0.218	0.19	0.186	0.082	0.453
	12	JHU_12.21377921	21377922	21224988	rs61760247	98795G>A	Intron variant	x	A	G	0.02727	110	0.018	0	0.065	0.001	0
	12	rs4149081	21378021	21225087	rs4149081	98894G>A	Intron variant	x	A	G	0.4273	110	0.219	0.19	0.188	0.082	0.453
	12	rs7966613	21379632	21226698	rs7966613	100505A>G	Intron variant	x	G	A	0.4545	110	0.32	0.355	0.305	0.194	0.456
	12	rs10841763	21382342	21229408	rs10841763	103215T>C	Intron variant	x	G	A	0.4545	110	0.302	0.355	0.236	0.194	0.456
	12	rs11045879	21382619	21229685	rs11045879	103492T>C	Intron variant	x	G	A	0.4273	110	0.219	0.19	0.189	0.082	0.453
	12	rs12578392	21389970	21237036	rs12578392	110843T>C	Intron variant	x	A	G	0.3818	110	0.551	0.586	0.704	0.575	0.253
	12	exm989046	21391976	21239042	rs34671512	112849A>C	Leu643Phe	Many	C	A	0.02727	110	0.044	0.052	0.065	0.049	0.005
	12	kgp18994182	21392205	21239271	rs72655363	113078C>T	3'UTR	*37.006	A	G	0.009259	108	0.00611343	0	0.023	0	0
	12	kgp19144716	21392244	21239310	rs74064260	113117G>C	3'UTR	*43.002, *44.001	C	G	0.02727	110	0.005	0	0.017	0	0
	12	rs4149085	21392290	21239356	rs4149085	113163T>C	3'UTR	*1.004, *37.003, *39.001	G	A	0.3333	108	0.082	0.02	0	0.0405629	0.337
	12	rs4149087	21392562	21239628	rs4149087	113435T>G	3'UTR	x	A	C	0.3818	110	0.552	0.587	0.707	0.575	0.255
	12	rs4149088	21392586	21239652	rs4149088	113459A>G	3'UTR	x	A	G	0.3818	110	0.552	0.586	0.707	0.575	0.255
SLCO1A2	12	kgp19077368	21417618	21264684	rs116583452	-	3'UTR	?	G	A	0.009091	110	0.00989852	0.02	0.037	0	0
(-)	12	kgp18756858	21417704	21264770	rs75967989	-	3'UTR	?	G	A	0.04545	110	0.014	0.02	0.049	0	0
	12	kgp5430110	21418398	21265464	rs71446763	-	3'UTR	?	A	G	0.05455	110	0.073	0.128	0.042	0.128	0.003
	12	kgp19005951	21418634	21265700	rs113341884	-	3'UTR	?	A	C	0.03636	110	0.01	0.02	0.035	0	0
	12	kgp18925372	21418783	21265849	rs73250843	-	3'UTR	?	A	G	0.04545	110	0.027	0.02	0.099	0	0
	12	kgp18992950	21418825	21265891	rs111512821	-	3'UTR	?	G	A	0.05455	110	0.011	0.02	0.039	0	0
	12	kgp18907944	21419223	21266289	rs77441275	-	3'UTR	?	G	A	0.01818	110	0.016	0.001	0.055	0	0
	12	rs10841781	21419395	21266461	rs10841781	-	3'UTR	?	G	A	0.3818	110	0.247	0.178	0.242	0.267	0.372
	12	rs11045917	21419948	21267014	rs11045917	-	3'UTR	?	A	G	0.03636	110	0.073	0.128	0.04	0.128	0.003
	12	rs7975594	21420136	21267202	rs7975594	-	3'UTR	?	G	A	0.01818	110	0.018	0.001	0.062	0	0
	12	kgp6628423	21420471	21267537	rs4149009	-	3'UTR	?	A	G	0.4636	110	0.381	0.296	0.576	0.317	0.37
	12	kgp19072684	21420624	21267690	rs78801100	-	3'UTR	?	A	G	0.009091	110	0.015	0.02	0.056	0	0
	12	kgp3508260	21421039	21268105	rs4149008	-	3'UTR	?	A	G	0.4091	110	0.307	0.168	0.533	0.189	0.365
	12	rs12317843	21421343	21268409	rs12317843	-	3'UTR	?	G	A	0.2	110	0.152	0.119	0.388	0.053	0.00154321
	12	kgp18782031	21421458	21268524	rs73250847	-	3'UTR	?	G	A	0.08182	110	0.048	0.02	0.175	0	0
	12	kgp18942601	21421655	21268721	rs115656549	-	3'UTR	?	G	A	0.01818	110	0.00133465	0.02	0.002	0	0
	12	kgp591101	21421770	21268836	rs4149006	-	3'UTR	?	A	C	0.2636	110	0.22	0.153	0.188	0.254	0.366
	12	kgp18926732	21421780	21268846	rs112403792	-	3'UTR	?	A	G	0.009091	110	0.019	0.001	0.067	0	0.001
	12	rs11045919	21422253	21269319	rs11045919	-	3'UTR	?	C	A	0.1818	110	0.151	0.12	0.386	0.053	0.00154143
	12	kgp19038348	21422319	21269385	rs74066041	-	3'UTR	?	A	G	0.02727	110	0.009	0.02	0.033	0	0
	12	rs4140389	21422365	21269431	rs4140389	-	3'UTR	?	A	C	0.3727	110	0.286	0.17	0.457	0.189	0.365
	12	kgp18889098	21422479	21269545	rs11045920	-	3'UTR	?	A	C	0.04545	110	0.014	0.02	0.049	0	0
	12	exm989056	21422492	21269558	rs11568557	-	Thr668Ser	?	C	G	0.05455	110	0.011	0.02	0.038	0	0
	12	rs7967354	21424003	21271069	rs7967354	-	Intron variant	?	G	A	0.4455	110	0.308	0.168	0.533	0.194	0.365
	12	rs10841782	21424137	21271203	rs10841782	-	Intron variant	?	A	G	0.3091	110	0.171	0.051	0.194	0.141	0.364
	12	12:21428246-AC	21428246	21275312	rs3764045	-	Intron variant	?	C	A	0.2545	110	0.124	0.02	0.069	0.128	0.367
	12	kgp7951664	21428307	21275373	rs11568565	-	Cys554=	?	A	G	0.04545	110	0.027	0.029	0.051	0.013	0.001
	12	rs11045927	21429069	21276135	rs11045927	-	Intron variant	?	C	A	0.1545	110	0.139	0.118	0.343	0.053	0.00154202
	12	rs7316412	21430972	21278038	rs7316412	-	Intron variant	?	G	C	0.04545	110	0.085	0.001	0.251	0.04	0.035
	12	JHU_12.21433632	21433633	21280699	rs11535999	-	Intron variant	?	C	A	0.4818	110	0.357	0.297	0.488	0.315	0.371
	12	rs4149003	21444099	21291165	rs4149003	-	Intron variant	?	G	A	0.3909	110	0.17	0.024	0.226	0.13	0.366
	12	rs6487215	21444991	21292057	rs6487215	-	Intron variant	?	A	G	0.09091	110	0.133	0.13	0.299	0.073	0.003
	12	kgp18976009	21446936	21294002	rs11568574	-	Ser460=	?	G	A	0.04545	110	0.013	0.02	0.045	0	0
	12	JHU_12.21452356	21452357	21299423	rs115865982	-	Intron variant	?	A	G	0.02727	110	0.008	0.02	0.026	0	0
	12	rs11568551	21453351	21300417	rs11568551	-	Ile281Val	?	G	A	0.09091	110	<0.001	0.02	0	0	0.002
	12	kgp18801792	21453466	21300532	rs11568550	-	Val242=	?	A	G	0.04545	110	0.013	0.001	0.045	0	0
	12	rs11832851	21454479	21301545	rs11832851	-	Intron variant	?	A	G	0.1455	110	0.066	0.02	0.238	0	0
	12	rs11568563	21457434	21304500	rs11568563	-	Glu172Asp	*3	C	A	0.01818	110	0.026	0.069	0.014	0.016	0		Sortica et al., 2017
	12	JHU_12.21458799	21458800	21305866	rs3794319	-	Intron variant	?	A	G	0.5	110	0.673	0.845	0.429	0.742	0.631
	12	exm989136	21459876	21306942	rs11568567	-	Asn128Tyr	?	A	T	0.009091	110	0.005	0.02	0.0193004	0	0
	12	rs4148993	21461106	21308172	rs4148993	-	Intron variant	?	G	A	0.5	110	0.628	0.728	0.425	0.689	0.63
	12	kgp19024393	21471732	21318798	rs11568568	-	Asn62=	?	G	A	0.009091	110	0.017	0.02	0.063	0	0
	12	rs4078	21476983	21324049	rs4078	-	Intron variant	?	G	A	0.02727	110	0.071	0.117	0.058	0.11	0.00115429
	12	rs11832394	21478792	21325858	rs11832394	-	Intron variant	?	A	G	0.09091	110	0.0483875	0.02	0.173	0	0
	12	rs4148987	21482481	21329547	rs4148987	-	Intron variant	?	A	G	0.3636	110	0.305	0.295	0.298	0.334	0.359
	12	rs4148985	21486186	21333252	rs4148985	-	Intron variant	?	A	G	0.4909	110	0.362	0.296	0.503	0.334	0.361
	12	12:21487068-C-T	21487068	21334134	rs4148981	-	Intron variant	?	A	G	0.4909	110	0.363	0.301	0.503	0.334	0.36
	12	12:21488004-C-T	21488004	21335070	rs3764043	-	Intron variant	?	A	G	0.05455	110	0.088	0.024	0.001	0.183	0.171
	12	12:21488675-C-T	21488675	21335741	rs4148978	-	Intron variant	?	A	G	0.4909	110	0.36059	0.29	0.503	0.334	0.359
	12	12:21488748-C-T	21488748	21335814	rs4148977	-	Intron variant	?	A	G	0.4909	110	0.360613	0.29	0.503	0.334	0.359
	12	JHU_12.21491007	21491008	21338074	rs142047284	-	Intron variant	?	G	A	0.02727	110	0.009	0.02	0.033	0	0
	12	JHU_12.21491168	21491169	21338235	rs12230953	-	Intron variant	?	G	A	0.4545	110	0.163	0.161	0.054	0.098	0.391
	12	rs2857468	21491937	21339003	rs2857468	-	Intron variant	?	A	T	0.1091	110	0.144	0.124	0.324	0.087	0.004
	12	rs4762818	21493529	21340595	rs4762818	-	Intron variant	?	A	G	0.1091	110	0.122	0.127	0.284	0.05	0.00135083
	12	rs1871288	21494891	21341957	rs1871288	-	Intron variant	?	A	T	0.05455	110	0.044	0.014	0.141	0.00228027	0.001
	12	rs56348138	21494953	21342019	rs56348138	-	Intron variant	?	A	G	0.09091	110	0.079	0.064	0.172	0.057	0.001
	12	JHU_12.21500635	21500636	21347702	rs865806038	-	Intron variant	?	G	A	0.1364	110	0.06612	0.045	0.1298	0.02	0
	12	rs12809856	21503061	21350127	rs12809856	-	Intron variant	?	G	A	0.4727	110	0.298	0.158	0.399	0.285	0.438
	12	rs12296154	21503467	21350533	rs12296154	-	Intron variant	?	G	A	0.463	108	0.613	0.702	0.51	0.595	0.562
	12	JHU_12.21505422	21505423	21352489	rs115685216	-	Intron variant	?	G	A	0.04545	110	0.013	0.02	0.048	0	0
	12	JHU_12.21506678	21506679	21353745	rs116712409	-	Intron variant	?	C	A	0.009091	110	0.005	0.02	0.017	0	0
	12	rs10743413	21507074	21354140	rs10743413	-	Intron variant	?	G	A	0.4545	110	0.276	0.164	0.317	0.277	0.438
	12	rs11045994	21507702	21354768	rs11045994	-	Intron variant	?	G	A	0.3909	110	0.262	0.236	0.216	0.278	0.397
	12	rs11045995	21508178	21355244	rs11045995	-	IAPP	?	G	A	0.3	110	0.167	0.106	0.075	0.191	0.395
	12	rs77397980	21519708	21366774	rs77397980	-	IAPP	?	G	A	0.05455	110	0.036	0.013	0.05	0.051	0.042
	12	kgp18707282	21527350	21374416	rs63378661	-	IAPP	?	G	A	0.05455	110	0.034	0.02	0.124	0	0
	12	JHU_12.21527573	21527574	21374640	rs867879167	-	IAPP	?	T	A	0.2	110	0.28021	-	0.42594	0.157	0.1693
	12	rs5484	21531437	21378503	rs5484	-	IAPP	?	A	G	0.1	110	0.137	0.182	0.183	0.147156	0.05
	12	rs5486	21532100	21379166	rs5486	-	IAPP	?	G	A	0.02727	110	0.035	0.048	0.0527243	0.0370447	0.000962279
	12	rs1056007	21532138	21379204	rs1056007	-	IAPP	?	A	C	0.1	110	0.137	0.183	0.183	0.144	0.047
	12	kgp4574142	21532191	21379257	rs5487	-	IAPP	?	G	A	0.03636	110	0.033	0.03	0.072	0.005	0.001
	12	rs5488	21532217	21379283	rs5488	-	IAPP	?	A	T	0.1	110	0.137	0.182	0.185	0.144	0.047
	12	kgp27631859	21532384	21379450	rs149908803	-	IAPP	?	A	G	0.07273	110	0.009	0.02	0	0.001	0.043
	12	rs3213208	21532459	21379525	rs3213208	-	IAPP	?	C	A	0.05455	110	0.072	0.06	0.119	0.082	0.044
	12	kgp6443294	21532547	21379613	rs12826421	-	IAPP	?	C	G	0.1	110	0.137	0.182	0.184	0.144	0.048
	12	rs2417977	21533168	21380234	rs2417977	-	Intron variant	?	G	A	0.1455	110	0.186	0.252	0.024	0.259	0.233
	12	rs7967902	21543215	21390281	rs7967902	-	Intron variant	?	C	A	0.3636	110	0.209	0.141	0.185	0.208	0.383
	12	JHU_12.21544767	21544768	21391834	rs74066478	-	Intron variant	?	A	G	0.01818	110	0.01	0.002	0.033	0	0
	12	kgp9637906	21547875	21394941	rs10841803	-	Intron variant	?	A	G	0.3636	110	0.207	0.141	0.178	0.204	0.382
	12	rs7967339	21555691	21402757	rs7967339	-	Intron variant	?	G	A	0.2091	110	0.297	0.316	0.275	0.358	0.19
	12	JHU_12.21561644	21561645	21408711	rs7135807	-	Intron variant	?	A	G	0.2182	110	0.37	0.369	0.378	0.397	0.305
	12	rs10841805	21563144	21410210	rs10841805	-	Intron variant	?	G	A	0.2182	110	0.37	0.37	0.377	0.397	0.306
	12	rs7303253	21564358	21411424	rs7303253	-	Intron variant	?	G	A	0.2636	110	0.322	0.417	0.186	0.37	0.312
	12	rs2417978	21567793	21414859	rs2417978	-	Intron variant	?	A	G	0.2909	110	0.37	0.445	0.388	0.328	0.262
	12	JHU_12.21571004	21571005	21418071	rs28446944	-	Intron variant	?	C	A	0.01818	110	0.084	0.085	0.171	0.022	0.032
CYP1A2	15	15:75041341-T-G	75041341	74749000	rs2069526	5156T>G	Intron variant	*1 suballeles	C	A	0.07273	110	0.071	0.024	0.123	0.069	0.084
(NG_061543.1)	15	15:75041917-C-A	75041917	74749576	rs762551	5732C>A	Intron variant	Many	C	A	0.3909	110	0.37	0.32	0.438	0.465	0.327
	15	rs17861157	75043592	74751251	rs17861157	7407C>A	Ser298Arg	*21	A	C	0.03636	110	0.024	0.02	0.089	0	0
	15	exm-rs2472304	75044238	74751897	rs2472304	8053G>A	Intron variant	*1M, *1Q, *17	A	G	0.06364	110	0.238	0.599	0.033	0.156	0.164
	15	15:75044400-G-C	75044400	74752059	rs3743484	8215G>C	Intron variant	*1N, *1P, *1R	C	G	0.1818	110	0.094	0.037	0.024	0.23	0.15
	15	kgp4058862	75047426	74755085	rs2470890	11241T>C	Asn516=	Many	A	G	0.03636	110	0.236	0.596	0.028	0.157	0.164
CYP2A6	19	kgp21458399	41351267	40845362	rs28399454	10086G>A	Val365Met	*17	A	G	0.04545	110	0.032	0.02	0.117	0	0.001
(NG_008377.1)	19	newrs28399444	41354191	40848286	rs568811809	7162delAA	Lys196fs	*20	D	I	0.009091	110	0.003	0.02	0.012	0	0
	19	JHU_19.41355611	41355612	40849707	rs56145769	5741G>A	Intron variant	*24.001, *24.002, *35.001	A	G	0.009091	110	0.013	0.002	0.044	0	0
	19	kgp21413710	41356310	40850405	rs8192720	5043C>T	Leu8=	Many	A	G	0.02727	110	0.045	0.006	0.029	0.004	0.177
CYP2B6	19	SNP27	41497346	40991441	rs35303484	5143A>G	Met46Val	*11	G	A	0.009091	110	0.001	0.004	0.000721732	0.001	0
(NG_007929.1)	19	rs2099361	41498348	40992443	rs2099361	6145C>A	Intron variant	x	C	A	0.1182	110	0.199	0.352	0.015	0.208	0.296
	19	rs16974790	41498946	40993041	rs16974790	6743G>A	Intron variant	x	A	G	0.25	108	0.11	0.011	0.374	0.018	0.00231125
	19	rs16974794	41499094	40993189	rs16974794	6891A>G	Intron variant	x	G	A	0.2273	110	0.093	0.002	0.335	0	0
	19	rs8100458	41500213	40994308	rs8100458	8010T>C	Intron variant	x	G	A	0.2909	110	0.304	0.339	0.123	0.35	0.431
	19	rs8101756	41502522	40996617	rs8101756	10319T>C	Intron variant	x	G	A	0.2545	110	0.332	0.244	0.398	0.398	0.229
	19	rs6508964	41502602	40996697	rs6508964	10399G>A	Intron variant	x	G	A	0.1727	110	0.247	0.415	0.057	0.253	0.339
	19	rs4803417	41508020	41002115	rs4803417	15817C>A	Intron variant	x	C	A	0.2455	110	0.278	0.413	0.169	0.255	0.34
	19	19:41510063-G-T	41510063	41004158	rs186335453	17860G>T	Gly110Val	*35	A	C	0.009091	110	<0.001	0.02	0.00162135	0	0
	19	JHU_19.41512376	41512377	41006472	rs12985017	20174T>C	Intron variant	x	G	A	0.08333	108	0.054	0.061	0.06	0.049	0.05
	19	19:41512792-C-T	41512792	41006887	rs4803419	20589C>T	Intron variant	x	A	G	0.2364	110	0.289	0.32	0.082	0.342	0.436
	19	19:41512841-G-T	41512841	41006936	rs3745274	20638G>T	Gln172His	Many incl *6	A	C	0.2545	110	0.316	0.236	0.374	0.381	0.215
	19	kgp21326314	41512877	41006972	rs115016447	20674T>C	Phe184=	x	G	A	0.009091	110	0.00140261	<0.001	0.004	0	0
	19	19:41512962-TC	41512962	41007057	rs371424910	20759T>C	Phe213Leu	x	G	A	0.009091	110	<0.001	0.02	<0.001	0.000130659	0
	19	19:41515702-T-C	41515702	41009797	rs2279345	23499T>C	Intron variant	x	A	G	0.2545	110	0.265	0.378	0.223	0.211	0.306
	19	rs8192718	41515814	41009909	rs8192718	23611G>A	Intron variant	x	A	G	0.04545	110	0.02	0.011	0	0.026	0.058
	19	kgp21448962	41516009	41010104	rs35468935	23806C>T	Phe311=	*17.001	A	G	0.02727	110	0.006	0.002	0.019	0	0.002
	19	rs6508965	41517688	41011783	rs6508965	25485T>C	Intron variant	x	A	G	0.2545	110	0.265	0.379	0.223	0.211	0.306
	19	exm1470224	41518221	41012316	rs28399499	26018T>C	Ile328Thr	*18	G	A	0.07273	110	0.023	0.011	0.082	0	0
	19	exm1470233	41518337	41012432	rs143979776	26134G>T	Val367Leu	x	A	C	0.009091	110	0.002	0.011	0.008	0	0
	19	19:41518773-C-T	41518773	41012868	rs8192719	26570C>T	Intron variant	x	A	G	0.2545	110	0.317	0.242	0.374	0.381	0.216
	19	19:41519306-G-A	41519306	41013401	rs36118214	27103G>A	Intron variant	x	A	G	0.1909	110	0.07	0.001	0.251	0	0
	19	exm-rs7260329	41521638	41015733	rs7260329	29435G>A	Intron variant	x	A	G	0.2455	110	0.301	0.321	0.121	0.358	0.422
	19	JHU_19.41522337	41522338	41016433	rs71337576	30135A>G	Intron variant	x	A	G	0.1182	110	0.287	0.379	0.19	0.352	0.306
	19	exm1470253	41522583	41016678	rs147991149	30380C>T	Arg443Cys	x	A	G	0.009091	110	<0.001	0.011	0	0.002	0
	19	kgp21549305	41522804	41016899	rs34749331	30601G>A	3'UTR	x	A	G	0.01818	110	0.00795946	0.011	0.03	0	0
	19	rs28399502	41522870	41016965	rs28399502	30667C>A	3'UTR	x	A	C	0.01852	108	0.011	0.011	0.039	0	0
	19	kgp10606989	41523303	41017398	rs7246465	31100T>C	3'UTR	Many	A	G	0.2364	110	0.262	0.381	0.207	0.201	0.312
	19	kgp29560897	41523566	41017661	rs142209151	31363A>C	3'UTR	x	C	A	0.009091	110	0.002	0.011	0.008	0	0
	19	kgp2885282	41524087	41018182	rs707265	31884A>G	3'UTR	Many	A	G	0.25	108	0.26	0.387	0.181	0.211	0.326
	19	JHU_19.41524130	41524131	41018226	rs12979270	31928A>C	3'UTR	*1.007, *2.003, *15.001	C	A	0.3056	108	0.232	0.209	0.234	0.239	0.302
	19	kgp8949913	41524153	41018248	rs1042389	31950T>C	3'UTR	*1.007, *2.003, *15.001	G	A	0.3091	110	0.234	0.211	0.237	0.24	0.305
	19	kgp29581358	41524203	41018298	rs61365636	32000G>C	3'UTR	x	C	G	0.009091	110	0.002	0	0.008	0	0
CYP2A13	19	rs16974961	41600054	41094149	rs16974961	10687G>T	Intron variant	x	A	C	0.03636	110	0.061	0.072	0.119	0.046	0.004
(NG_007928.1)	19	kgp21369081	41600254	41094349	rs116368403	10887C>A	Gln360Lys	x	A	C	0.01818	110	0.008	0	0.031	0	0
CYP2D6	22	22:42522613-G-C	42522613	42126611	rs1135840	9200G>C	Ser486Thr	Many	G	C	0.3796	108	0.401	0.454	0.324	0.472	0.296
(NG_008376.4)
MAOA	X	rs5906938	43540295	43681047	rs5906938	29887A>G	Intron variant	?	A	G	0.4818	110	0.416	0.296	0.282	0.659	0.572
(NG_008957.2)	X	exm2262816	43567173	43707926	rs28375424	56766C>T	Intron variant	?	A	G	0.2636	110	0.155	0.003	0.546	0.011	0
	X	rs1800464	43571197	43711950	rs1800464	60790A>C	Arg129=	?	C	A	0.2455	110	0.157	0.04	0.506	0.026	0
	X	rs3810709	43587868	43728621	rs3810709	77461C>T	Intron variant	?	A	G	0.287	108	0.459	0.674	0.319	0.326	0.425
	X	rs73625696	43588676	43729429	rs73625696	78269G>A	Intron variant	?	A	G	0.08182	110	0.082	0.001	0.296	0	0
	X	kgp31071728	43591036	43731789	rs6323	80629G>T	Arg297=	?	C	A	0.4	110	0.375	0.287	0.138	0.648	0.574993		Ariffin et al., 2019
	X	rs1137070	43603391	43744144	rs1137070	92984T>C	Asp470=	?	A	G	0.4273	110	0.448	0.292	0.357	0.648	0.576
MAOB	X	rs3027438	43626085	43766838	rs3027438	120638T>C	3'UTR	?	G	A	0.2636	110	0.101	0.005	0.043	0.223	0.169
(NG_008723.2)	X	rs3027439	43626136	43766889	rs3027439	120587T>C	3'UTR	?	G	A	0.2636	110	0.134	0.005	0.161	0.223	0.169
	X	rs3027440	43626481	43767234	rs3027440	120242T>C	3'UTR	?	G	A	0.2636	110	0.101	0.004	0.043	0.221	0.169
	X	rs17462	43626496	43767249	rs17462	120227A>G	3'UTR	?	G	A	0.1	110	0.063	0.001	0.227	0	0
	X	kgp30567192	43626815	43767568	rs6324	119908C>T	Pro487=	?	A	G	0.2636	110	0.101	0.004	0.043	0.221	0.169
	X	rs10521432	43633740	43774493	rs10521432	112983C>T	Intron variant	?	A	G	0.3545	110	0.269	0.283	0.405	0.294	0.12
	X	rs141504623	43665556	43806309	rs141504623	81167A>G	Intron variant	?	G	A	0.009091	110	0.012	0	0.043	0	0
1 RefSeq = Genomic reference sequence identifier; (-) RefSeq identifier (NG number) not available.
2 Listed in PharmVar, other nomenclature databases, or literature; x represents allele for the variant not listed in those resources.
n/a Information is not available in or translatable from UGT Allele Nomenclature tables (https://www.pharmacogenomics.pha.ulaval.ca/ugt-alleles-nomenclature/).
? Could not be found/has not been determined.
3 These are the frequencies of the same allele determined as the minor allele (A1) in the Malagasy samples.
† Five UGT1A gene locus members (1A1, 1A3, 1A4, 1A6, and 1A9) located on Chr2: 234580544..234681946.
fs = frame shift.
X = termination (stop gained).
UTR = untranslated region.
RUNDC3B = RUN domain containing 3B gene partly overlaps with ABCB1.
IAPP = Islet amyloid polypetide gene partly overlaps with SCLO1A2.
CHR = Chromosome.
A1 = minor allele; A2 = major allele; MAF = minor allele frequency.
NCHROBS = Number of allele observations.
Global = All populations combined in 1000 Genomes Project (or other allele frequency databases).
EUR, European; AFR, African; SAS, South Asian; EAS, East Asian.
The rows highlighted in green represent the variants implicated by others in PQ metabolism or transport and/or treatment response (see Table 3).
